# Supplementary material for: Characterization and identification of hidden rare variants in the human genome
Source: PubMed Central journal article supplement (PMC4416239; doi:10.1186/s12864-015-1481-9), 2015-04-24
Supplement: 12864_2015_1481_MOESM1_ESM.pdf [file 12864_2015_1481_MOESM1_ESM.pdf]

# **Supplemental Methods to "Characterization and identification of hidden rare variants in the human genome".**

Alberto Magi<sup>1,\*</sup>, Romina D'Aurizio<sup>2</sup>, Flavia Palombo<sup>3</sup>, Ingrid Cifola<sup>4</sup>, Lorenzo Tattini<sup>5</sup>, Roberto Semeraro<sup>1</sup>, Tommaso Pippucci<sup>3</sup>, Betti Giusti<sup>1</sup>, Giovanni Romeo<sup>3</sup>, Rosanna Abbate<sup>1</sup> and Gian Franco Gensini<sup>1</sup>.

<sup>1</sup>Department of Clinical and Experimental Medicine, University of Florence, Florence, Italy.

<sup>2</sup>Institute of Informatics and Telematics and Institute of Clinical Physiology, National Research Council, Pisa, Italy.

<sup>3</sup>Medical Genetics Unit, Department of Medical and Surgical Sciences, University of Bologna, Bologna, Italy.

<sup>4</sup>Institute for Biomedical Technologies, National Research Council, Segrate, Milano, Italy.

<sup>5</sup>Department of Neuroscience, Pharmacology and Child Health, University of Florence, Florence, Italy.

Email: Alberto Magi\* - [albertomagi@gmail.com](mailto:albertomagi@gmail.com);

\*Corresponding author

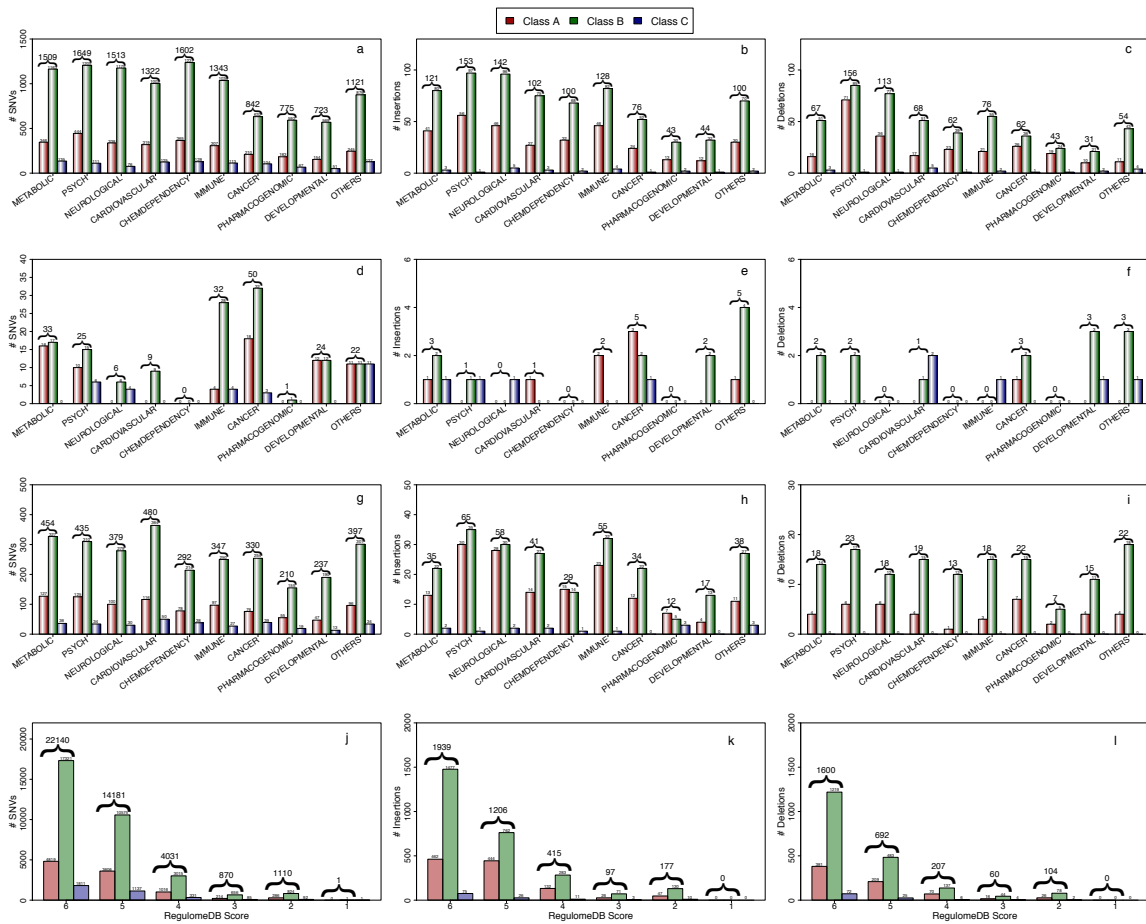

Supplemental Figure 1: GAD and RegulomeDB annotation of GRCh37 RRAs loci. Panels a, b and c report the GAD annotation of SNVs (a), Insertions (b) and Deletions (c) that belong to Protein-coding genes. Panels d, e and f report the GAD annotation of SNVs, Insertions and Deletions that belong to ncRNA biotypes. Each variant can be annotated to multiple GAD phenotype. Panels g, h and i report the GAD annotation of SNVs (g), Insertions (h) and Deletions (i) that belong to regulatory elements annotated at ENCODE. Panels j, k and l report the total number of SNVs (j), Insertions (k) and Deletions (l) as a function of RegulomeDB score. In each panel of the figure, RRA loci have been classified as belonging to class A, B and C (see main text for more details). Numbers on the top of curly brackets represent the sum of classes A and B variants.

Table 1: GENCODE and ENCODE annotations of all the RRAs loci for GRCh37.

| Type             | Total Variants | Class A      | Class B      | Classes A+B  | Class C    |
|------------------|----------------|--------------|--------------|--------------|------------|
| Total SNVs       | 85111 (6478)   | 17944 (1555) | 60714 (4456) | 78658 (6011) | 6453 (467) |
| Intergenic       | 40321 (2374)   | 8004 (502)   | 29053 (1692) | 37057 (2194) | 3264 (180) |
| Gencode          | 44790 (4104)   | 9940 (1053)  | 31661 (2764) | 41601 (3817) | 3189 (287) |
| Genic*           | 35428 (3441)   | 7765 (870)   | 25178 (2335) | 32943 (3205) | 2485 (236) |
| Intronic         | 33521 (2853)   | 7310 (693)   | 23862 (1965) | 31172 (2658) | 2349 (195) |
| UTR              | 1103 (226)     | 253 (57)     | 770 (151)    | 1023 (208)   | 80 (18)    |
| Coding           | 804 (362)      | 202 (120)    | 546 (219)    | 748 (339)    | 56 (23)    |
| Functional       | 580 (306)      | 167 (110)    | 373 (179)    | 540 (289)    | 40 (17)    |
| missense         | 476 (272)      | 138 (97)     | 305 (160)    | 443 (257)    | 33 (15)    |
| splicing         | 98 (30)        | 27 (11)      | 66 (18)      | 92 (28)      | 6 (2)      |
| nonsense         | 6 (4)          | 2 (2)        | 3 (2)        | 5 (4)        | 1 (0)      |
| OMIM             | 106 (53)       | 28 (16)      | 72 (33)      | 100 (49)     | 6 (4)      |
| Pseudogenes      | 734 (38)       | 135 (7)      | 518 (26)     | 653 (33)     | 81 (5)     |
| non coding RNA   | 8628 (625)     | 2040 (176)   | 5965 (403)   | 8005 (579)   | 623 (46)   |
| lincRNA          | 5363 (419)     | 1282 (120)   | 3669 (264)   | 4951 (384)   | 412 (35)   |
| antisense        | 1698 (108)     | 395 (26)     | 1212 (76)    | 1607 (102)   | 91 (6)     |
| PT               | 1228 (79)      | 288 (28)     | 842 (47)     | 1130 (75)    | 98 (4)     |
| NMD              | 194 (12)       | 49 (2)       | 132 (9)      | 181 (11)     | 13 (1)     |
| SO               | 120 (6)        | 24 (0)       | 90 (6)       | 114 (6)      | 6 (0)      |
| Other ncRNA      | 25 (1)         | 2 (0)        | 20 (1)       | 22 (1)       | 3 (0)      |
| Encode Elements  | 20438 (2010)   | 4723 (495)   | 14138 (1374) | 18861 (1869) | 1577 (141) |
| TFP              | 5199 (464)     | 1209 (114)   | 3596 (319)   | 4805 (433)   | 394 (31)   |
| DHS              | 7660 (669)     | 1768 (157)   | 5261 (453)   | 7029 (610)   | 631 (59)   |
| Enhancer         | 992 (89)       | 221 (19)     | 698 (65)     | 919 (84)     | 73 (5)     |
| TFP-DHS          | 2459 (300)     | 536 (69)     | 1734 (213)   | 2270 (282)   | 189 (18)   |
| TFP-Enhancer     | 1878 (200)     | 446 (57)     | 1300 (135)   | 1746 (192)   | 132 (8)    |
| DHS-Enhancer     | 516 (44)       | 135 (13)     | 348 (30)     | 483 (43)     | 33 (1)     |
| TFP-DHS-Enhancer | 1734 (244)     | 408 (66)     | 1201 (159)   | 1609 (225)   | 125 (19)   |
| Total Insertions | 6700 (619)     | 1870 (236)   | 4616 (370)   | 6486 (606)   | 214 (13)   |
| Intergenic       | 2912 (211)     | 751 (71)     | 2052 (131)   | 2803 (202)   | 109 (9)    |
| Gencode          | 3788 (408)     | 1119 (165)   | 2564 (239)   | 3683 (404)   | 105 (4)    |
| Genic*           | 2983 (330)     | 862 (130)    | 2043 (199)   | 2905 (329)   | 78 (1)     |
| Intronic         | 2819 (272)     | 807 (107)    | 1937 (164)   | 2744 (271)   | 75 (1)     |
| UTR              | 119 (34)       | 33 (9)       | 84 (25)      | 117 (34)     | 2 (0)      |
| Coding           | 45 (24)        | 22 (14)      | 22 (10)      | 44 (24)      | 1 (0)      |
| Functional       | 56 (28)        | 23 (13)      | 31 (14)      | 54 (27)      | 2 (1)      |
| splicing         | 14 (5)         | 4 (0)        | 9 (4)        | 13 (4)       | 1 (1)      |
| Frameshift       | 42 (23)        | 19 (13)      | 22 (10)      | 41 (23)      | 1 (0)      |
| OMIM             | 3 (0)          | 1 (0)        | 2 (0)        | 3 (0)        | 0 (0)      |
| Pseudogenes      | 61 (4)         | 14 (0)       | 44 (3)       | 58 (3)       | 3 (1)      |
| non coding RNA   | 744 (74)       | 243 (35)     | 477 (37)     | 720 (72)     | 24 (2)     |
| lincRNA          | 404 (31)       | 119 (14)     | 268 (17)     | 387 (31)     | 17 (0)     |
| antisense        | 146 (14)       | 56 (7)       | 89 (7)       | 145 (14)     | 1 (0)      |
| PT               | 126 (20)       | 36 (7)       | 84 (11)      | 120 (18)     | 6 (2)      |
| NMD              | 48 (8)         | 28 (7)       | 20 (1)       | 48 (8)       | 0 (0)      |
| SO               | 17 (1)         | 4 (0)        | 13 (1)       | 17 (1)       | 0 (0)      |
| Other ncRNA      | 3 (0)          | 0 (0)        | 3 (0)        | 3 (0)        | 0 (0)      |
| Encode Elements  | 1744 (208)     | 569 (69)     | 1122 (134)   | 1691 (203)   | 53 (5)     |
| TFP              | 509 (64)       | 159 (24)     | 342 (40)     | 501 (64)     | 8 (0)      |
| DHS              | 484 (50)       | 173 (18)     | 291 (31)     | 464 (49)     | 20 (1)     |
| Enhancer         | 83 (7)         | 26 (2)       | 55 (4)       | 81 (6)       | 2 (1)      |
| TFP-DHS          | 200 (22)       | 75 (9)       | 120 (12)     | 195 (21)     | 5 (1)      |
| TFP-Enhancer     | 236 (32)       | 73 (10)      | 157 (20)     | 230 (30)     | 6 (2)      |
| DHS-Enhancer     | 39 (1)         | 14 (0)       | 23 (1)       | 37 (1)       | 2 (0)      |
| TFP-DHS-Enhancer | 193 (32)       | 49 (6)       | 134 (26)     | 183 (32)     | 10 (0)     |
| Total Deletions  | 4462 (494)     | 1206 (145)   | 3095 (327)   | 4301 (472)   | 161 (22)   |
| Intergenic       | 1869 (157)     | 504 (44)     | 1298 (103)   | 1802 (147)   | 67 (10)    |
| Gencode          | 2593 (337)     | 702 (101)    | 1797 (224)   | 2499 (325)   | 94 (12)    |
| Genic*           | 2077 (290)     | 555 (84)     | 1444 (195)   | 1999 (279)   | 78 (11)    |
| Intronic         | 2006 (257)     | 536 (76)     | 1395 (172)   | 1931 (248)   | 75 (9)     |
| UTR              | 51 (19)        | 12 (1)       | 36 (16)      | 48 (17)      | 3 (2)      |
| Coding           | 20 (14)        | 7 (7)        | 13 (7)       | 20 (14)      | 0 (0)      |
| Functional       | 24 (15)        | 8 (7)        | 15 (7)       | 23 (14)      | 1 (1)      |
| splicing         | 6 (3)          | 2 (1)        | 3 (1)        | 5 (2)        | 1 (1)      |
| Frameshift       | 18 (12)        | 6 (6)        | 12 (6)       | 18 (12)      | 0 (0)      |
| OMIM             | 4 (2)          | 0 (0)        | 4 (2)        | 4 (2)        | 0 (0)      |
| Pseudogenes      | 30 (4)         | 10 (3)       | 20 (1)       | 30 (4)       | 0 (0)      |
| non coding RNA   | 486 (43)       | 137 (14)     | 333 (28)     | 470 (42)     | 16 (1)     |
| lincRNA          | 278 (22)       | 87 (8)       | 181 (13)     | 268 (21)     | 10 (1)     |
| antisense        | 115 (12)       | 26 (4)       | 85 (8)       | 111 (12)     | 4 (0)      |
| PT               | 74 (7)         | 20 (2)       | 52 (5)       | 72 (7)       | 2 (0)      |
| NMD              | 11 (1)         | 4 (0)        | 7 (1)        | 11 (1)       | 0 (0)      |
| SO               | 5 (1)          | 0 (0)        | 5 (1)        | 5 (1)        | 0 (0)      |
| Other ncRNA      | 3 (0)          | 0 (0)        | 3 (0)        | 3 (0)        | 0 (0)      |
| Encode Elements  | 1023 (162)     | 304 (44)     | 682 (112)    | 986 (156)    | 37 (6)     |
| TFP              | 322 (53)       | 95 (15)      | 220 (35)     | 315 (50)     | 7 (3)      |
| DHS              | 302 (40)       | 96 (10)      | 195 (29)     | 291 (39)     | 11 (1)     |
| Enhancer         | 63 (9)         | 20 (3)       | 38 (5)       | 58 (8)       | 5 (1)      |
| TFP-DHS          | 114 (23)       | 29 (8)       | 81 (15)      | 110 (23)     | 4 (0)      |
| TFP-Enhancer     | 126 (21)       | 36 (5)       | 83 (15)      | 119 (20)     | 7 (1)      |
| DHS-Enhancer     | 24 (2)         | 9 (0)        | 14 (2)       | 23 (2)       | 1 (0)      |
| TFP-DHS-Enhancer | 72 (14)        | 19 (3)       | 51 (11)      | 70 (14)      | 2 (0)      |

Columns report the total number of variants (Total Variants), the number of variants that belong to classes A, B, A+B and C for all RRA SNVs and InDels. Rows report the GENCODE and ENCODE features at which each RRA has been annotated. For each variant type, in parenthesis are reported the total number of RRAs with RS score larger than 2.

Table 2: Germline and Somatic variants identified by RAREVATOR, MuTect and VarScan2 in the Uveal Melanomas dataset.

| Category       | Homozygous | Heterozygous | Somatic | VarScan | Mutect |
|----------------|------------|--------------|---------|---------|--------|
| Total SNVs     | 778        | 698          | 22      | 0       | 0      |
| Class A        | 52         | 69           | 1       | 0       | 0      |
| UTR            | 0          | 2            | 0       | 0       | 0      |
| Synonymous     | 0          | 1            | 0       | 0       | 0      |
| Missense       | 0          | 2            | 0       | 0       | 0      |
| Splicing       | 0          | 0            | 0       | 0       | 0      |
| Nonsense       | 0          | 0            | 0       | 0       | 0      |
| Class B        | 665        | 552          | 18      | 0       | 0      |
| UTR            | 15         | 15           | 0       | 0       | 0      |
| Synonymous     | 1          | 17           | 4       | 0       | 0      |
| Missense       | 1          | 27           | 6       | 0       | 0      |
| Splicing       | 0          | 7            | 0       | 0       | 0      |
| Nonsense       | 0          | 0            | 0       | 0       | 0      |
| Class C        | 61         | 77           | 3       | 0       | 0      |
| UTR            | 0          | 2            | 1       | 0       | 0      |
| Synonymous     | 0          | 4            | 0       | 0       | 0      |
| Missense       | 0          | 3            | 2       | 0       | 0      |
| Splicing       | 0          | 0            | 0       | 0       | 0      |
| Nonsense       | 0          | 0            | 0       | 0       | 0      |
| GAD            | 75         | 97           | 4       | 0       | 0      |
| GADCancer      | 9          | 16           | 0       | 0       | 0      |
| ENCODE         | 265        | 300          | 14      | 0       | 0      |
| Total InDels   | 58         | 54           | 0       | 0       | -      |
| Class A        | 5          | 8            | 0       | 0       | -      |
| UTR            | 0          | 0            | 0       | 0       | -      |
| Non-Frameshift | 0          | 0            | 0       | 0       | -      |
| Splicing       | 0          | 0            | 0       | 0       | -      |
| Frameshift     | 0          | 0            | 0       | 0       | -      |
| Class B        | 47         | 39           | 0       | 0       | -      |
| UTR            | 0          | 6            | 0       | 0       | -      |
| Non-Frameshift | 0          | 0            | 0       | 0       | -      |
| Splicing       | 0          | 0            | 0       | 0       | -      |
| Frameshift     | 0          | 0            | 0       | 0       | -      |
| Class C        | 6          | 7            | 0       | 0       | -      |
| UTR            | 0          | 1            | 0       | 0       | -      |
| Non-Frameshift | 0          | 0            | 0       | 0       | -      |
| Splicing       | 2          | 0            | 0       | 0       | -      |
| Frameshift     | 0          | 0            | 0       | 0       | -      |
| GAD            | 8          | 8            | 0       | 0       | -      |
| GADCancer      | 0          | 0            | 0       | 0       | -      |
| ENCODE         | 11         | 18           | 0       | 0       | -      |

Columns report the total number of variants (Total Variants), the number of variants that belong to classes A, B, A+B and C for all RRA SNVs and InDels. Rows report the GENCODE and ENCODE features at which each RRA has been annotated.

Table 3: DriverDB prediction. Genes with missense RRA somatic mutations in Uveal Melanoma and predicted as driver by the DriverDB resource.

| Cancer Type                           | DCC                        | CR1    | GCC2        | FAT2    | CLCN1 |
|---------------------------------------|----------------------------|--------|-------------|---------|-------|
| Acute Myeloid Leukemia                | -                          | -      | -           | -       | -     |
| Bladder Urothelial Carcinoma          | -                          | -      | Dendrix     | -       | -     |
| Breast invasive carcinoma             | NetBox                     | NetBox | -           | -       | -     |
| Colon adenocarcinoma                  | Dendrix, MDPFinder, NetBox | -      | -           | -       | -     |
| Glioblastoma multiforme               | NetBox                     | -      | -           | -       | -     |
| Kidney renal papillary cell carcinoma | -                          | -      | -           | -       | -     |
| Lung adenocarcinoma                   | NetBox                     | -      | -           | -       | Simon |
| Lung squamous cell carcinoma          | NetBox                     | -      | -           | -       | -     |
| Ovarian serous cystadenocarcinoma     | NetBox                     | -      | -           | -       | -     |
| Rectum adenocarcinoma                 | Dendrix, NetBox            | -      | -           | Dendrix | -     |
| Skin cutaneous melanoma               | NetBox, Simon              | NetBox | OncodriveFM | -       | Simon |
| Stomach adenocarcinoma                | NetBox                     | NetBox | -           | -       | -     |
| Thyroid carcinoma                     | -                          | -      | -           | -       | -     |
| Uterine Corpus Endometrioid Carcinoma | NetBox                     | -      | -           | -       | -     |

Columns report the cancer type and the RRA genes of Uveal Melanoma. For each gene and cancer type we report the algorithms that predicted that gene as a driver gene.

Table 4: MutSig analysis results on Uveal Melanoma dataset. The table reports the p-values calculated by the MutSig algorithm for the five genes with RRA missense mutations. The analyses have been performed by using the somatic mutations detected by MuTect and VarScan2, with and without the RRA variants.

| Somatic Caller      | DCC          | CR1          | GCC2         | FAT2         | CLCN1        |
|---------------------|--------------|--------------|--------------|--------------|--------------|
| muTect              | 0.188 (1620) | 0.633 (4753) | 0.659 (4902) | 0.344 (2840) | 0.313 (2595) |
| muTect + RAREVATOR  | 0.099 (907)  | 0.39 (3194)  | 0.545 (4266) | 0.168 (1461) | 0.169 (1476) |
| VarScan             | 0.982 (4393) | 0.998 (5010) | 0.989 (4548) | 1 (5383)     | 0.98 (4355)  |
| VarScan + RAREVATOR | 0.949 (3979) | 0.99 (4568)  | 0.983 (4405) | 1 (5382)     | 0.945 (3951) |

Columns report the genes with missense somatic RRA mutations in Uveal Melanoma, while rows reports the somatic caller used for generating the list of mutations for the MutSigCV analysis. In brackets is reported the ranking of each gene in the MutSig results.

Table 5: GO terms and pathways significantly enriched of genes that contains functionally relevant RRA loci.

| Database  | ID          | Name                                         | Gene Number | p-value | Gene Number (GRCh38) | p-value (GRCh38) |
|-----------|-------------|----------------------------------------------|-------------|---------|----------------------|------------------|
| REACTOME  | REACT_13552 | Integrin cell surface interactions           | 8           | 0.0077  | 7                    | 0.0133           |
| REACTOME  | REACT_216   | DNA Repair                                   | 8           | 0.0252  | 7                    | 0.0369           |
| REACTOME  | REACT_604   | Hemostasis                                   | 13          | 0.0334  | 13                   | 0.0107           |
| REACTOME  | REACT_18266 | Axon guidance                                | 5           | 0.0497  | 5                    | 0.0305           |
| REACTOME  | REACT_15314 | Hormone biosynthesis                         | 5           | 0.0595  | 5                    | 0.0369           |
| KEGG      | hsa04512    | ECM-receptor interaction                     | 9           | 0.0016  | 8                    | 0.0025           |
| KEGG      | hsa04510    | Focal adhesion                               | 14          | 0.0024  | 13                   | 0.0015           |
| KEGG      | hsa00230    | Purine metabolism                            | 9           | 0.0497  | 8                    | 0.053            |
| KEGG      | hsa00980    | Metabolism of xenobiotics by cytochrome P450 | 5           | 0.0741  | 5                    | 0.0435           |
| KEGG      | hsa00150    | Androgen and estrogen metabolism             | 4           | 0.0739  | 4                    | 0.0481           |
| GOTERM_BP | GO:0022610  | biological adhesion                          | 34          | 0.0028  | 24                   | 0.0578           |
| GOTERM_BP | GO:0007155  | cell adhesion                                | 34          | 0.0028  | 24                   | 0.059            |
| GOTERM_BP | GO:0051180  | vitamin transport                            | 5           | 0.0042  | 5                    | 0.0021           |
| GOTERM_BP | GO:0042157  | lipoprotein metabolic process                | 8           | 0.0073  | 7                    | 0.0105           |
| GOTERM_BP | GO:0051642  | centrosome localization                      | 3           | 0.0075  | 3                    | 0.0051           |
| GOTERM_BP | GO:0006869  | lipid transport                              | 11          | 0.0081  | 8                    | 0.0516           |
| GOTERM_BP | GO:0046942  | carboxylic acid transport                    | 11          | 0.0089  | 10                   | 0.0072           |
| GOTERM_BP | GO:0015849  | organic acid transport                       | 11          | 0.0093  | 10                   | 0.0075           |
| GOTERM_BP | GO:0042159  | lipoprotein catabolic process                | 3           | 0.0111  | 3                    | 0.0075           |
| GOTERM_BP | GO:0016337  | cell-cell adhesion                           | 16          | 0.0119  | 14                   | 0.012            |
| GOTERM_BP | GO:0010876  | lipid localization                           | 11          | 0.0137  | 8                    | 0.0725           |
| GOTERM_BP | GO:0031348  | negative regulation of defense response      | 5           | 0.0181  | -                    | -                |
| GOTERM_BP | GO:0008202  | steroid metabolic process                    | 12          | 0.0285  | 10                   | 0.0455           |
| GOTERM_BP | GO:0015721  | bile acid and bile salt transport            | 3           | 0.0308  | 3                    | 0.0212           |
| GOTERM_BP | GO:0042953  | lipoprotein transport                        | 3           | 0.0308  | -                    | -                |
| GOTERM_BP | GO:0007156  | homophilic cell adhesion                     | 9           | 0.0323  | 8                    | 0.0326           |
| GOTERM_BP | GO:0001894  | tissue homeostasis                           | 6           | 0.0323  | 6                    | 0.0151           |
| GOTERM_BP | GO:0010743  | regulation of foam cell differentiation      | 4           | 0.0324  | -                    | -                |
| GOTERM_BP | GO:0007160  | cell-matrix adhesion                         | 7           | 0.04    | -                    | -                |
| GOTERM_BP | GO:0008203  | cholesterol metabolic process                | 7           | 0.0458  | -                    | -                |
| GOTERM_BP | GO:0007229  | integrin-mediated signaling pathway          | 6           | 0.0476  | 5                    | 0.0788           |
| GOTERM_BP | GO:0030384  | phosphoinositide metabolic process           | 6           | 0.0552  | 6                    | 0.0269           |
| GOTERM_BP | GO:0006928  | cell motion                                  | 20          | 0.0804  | 19                   | 0.0273           |
| GOTERM_BP | GO:0048854  | brain morphogenesis                          | 3           | 0.0505  | 3                    | 0.0352           |
| GOTERM_BP | GO:0060249  | anatomical structure homeostasis             | 7           | 0.0795  | 7                    | 0.0364           |
| GOTERM_BP | GO:0042158  | lipoprotein biosynthetic process             | 5           | 0.0809  | 5                    | 0.045            |
| GOTERM_BP | GO:0048871  | multicellular organismal homeostasis         | 6           | 0.0924  | 6                    | 0.0471           |
| GOTERM_MF | GO:0005509  | calcium ion binding                          | 48          | 0.0001  | 41                   | 0.0003           |
| GOTERM_MF | GO:0051183  | vitamin transporter activity                 | 4           | 0.0045  | 4                    | 0.0028           |
| GOTERM_MF | GO:0046872  | metal ion binding                            | 145         | 0.0076  | 124                  | 0.0079           |
| GOTERM_MF | GO:0043167  | ion binding                                  | 148         | 0.0078  | 127                  | 0.007            |
| GOTERM_MF | GO:0043169  | cation binding                               | 146         | 0.0081  | 125                  | 0.008            |
| GOTERM_MF | GO:0008092  | cytoskeletal protein binding                 | 25          | 0.0137  | 22                   | 0.0138           |
| GOTERM_MF | GO:0015293  | symporter activity                           | 10          | 0.0196  | 10                   | 0.007            |
| GOTERM_MF | GO:0004000  | adenosine deaminase activity                 | 3           | 0.0214  | -                    | -                |
| GOTERM_MF | GO:0005201  | extracellular matrix structural constituent  | 7           | 0.0406  | 6                    | 0.0618           |
| GOTERM_MF | GO:0003779  | actin binding                                | 16          | 0.0576  | 16                   | 0.0158           |
| GOTERM_MF | GO:0001883  | purine nucleoside binding                    | 57          | 0.0914  | 52                   | 0.0335           |
| GOTERM_MF | GO:0001882  | nucleoside binding                           | -           | NA      | 52                   | 0.0373           |
| GOTERM_MF | GO:0030554  | adenyl nucleotide binding                    | 56          | 0.0972  | 51                   | 0.0378           |
| GOTERM_MF | GO:0016887  | ATPase activity                              | 16          | 0.068   | 15                   | 0.0384           |
| GOTERM_MF | GO:0015370  | solute:sodium symporter activity             | 5           | 0.0657  | 5                    | 0.0392           |
| GOTERM_CC | GO:0044430  | cytoskeletal part                            | 46          | 0.0006  | 39                   | 0.0012           |
| GOTERM_CC | GO:0005578  | proteinaceous extracellular matrix           | 21          | 0.0009  | 16                   | 0.0101           |
| GOTERM_CC | GO:0031012  | extracellular matrix                         | 22          | 0.001   | 16                   | 0.0186           |
| GOTERM_CC | GO:0044421  | extracellular region part                    | 44          | 0.0023  | 34                   | 0.0214           |
| GOTERM_CC | GO:0030016  | myofibril                                    | 10          | 0.0046  | 9                    | 0.0051           |
| GOTERM_CC | GO:0015629  | actin cytoskeleton                           | 17          | 0.0048  | 16                   | 0.002            |
| GOTERM_CC | GO:0044449  | contractile fiber part                       | 10          | 0.0052  | 9                    | 0.0056           |
| GOTERM_CC | GO:0044420  | extracellular matrix part                    | 10          | 0.0065  | 9                    | 0.0069           |
| GOTERM_CC | GO:0043292  | contractile fiber                            | 10          | 0.0081  | 9                    | 0.0084           |
| GOTERM_CC | GO:0030018  | Z disc                                       | 6           | 0.0099  | 6                    | 0.0046           |
| GOTERM_CC | GO:0015630  | microtubule cytoskeleton                     | 26          | 0.0155  | 23                   | 0.0123           |
| GOTERM_CC | GO:0031674  | I band                                       | 6           | 0.0204  | 6                    | 0.0098           |
| GOTERM_CC | GO:0030017  | sarcomere                                    | 8           | 0.0226  | 8                    | 0.0089           |
| GOTERM_CC | GO:0005604  | basement membrane                            | 7           | 0.0244  | 7                    | 0.0107           |
| GOTERM_CC | GO:0005856  | cytoskeleton                                 | 53          | 0.0247  | 45                   | 0.028            |
| GOTERM_CC | GO:0030139  | endocytic vesicle                            | 6           | 0.0268  | 5                    | 0.052            |
| GOTERM_CC | GO:0044463  | cell projection part                         | 13          | 0.0378  | 11                   | 0.0543           |
| GOTERM_CC | GO:0016324  | apical plasma membrane                       | 9           | 0.0379  | 9                    | 0.0144           |
| GOTERM_CC | GO:0005615  | extracellular space                          | 29          | 0.0382  | 24                   | 0.0626           |
| GOTERM_CC | GO:0005886  | plasma membrane                              | 125         | 0.0415  | 102                  | 0.0947           |
| GOTERM_CC | GO:0044433  | cytoplasmic vesicle part                     | 11          | 0.0435  | 9                    | 0.0794           |
| GOTERM_CC | GO:0009897  | external side of plasma membrane             | 10          | 0.0566  | 10                   | 0.0208           |
| GOTERM_CC | GO:0005874  | microtubule                                  | 14          | 0.053   | 13                   | 0.032            |
| GOTERM_CC | GO:0042995  | cell projection                              | 28          | 0.0696  | 25                   | 0.0453           |

Columns report the annotation database (Database), the code of the significant pathway/term (ID), the name of the pathway/term (Name), the number of RRA genes that belong to pathway/term (Gene Number) and the enrichment p-value calculated by the DAVID (p-value).

Table 6: TCGA driver genes with a functionally relevant RRA locus. The table reports the list of genes predicted as driver by Tambonero et al. that contain a missense or splicing RRA locus in GRCh37 and GRCh38.

| Driver Gene | Variant Type | N Cancer | Cancer Types       | Mutation Frequency |
|-------------|--------------|----------|--------------------|--------------------|
| ASPM        | missense     | 11       | LUNG ADENO         | 0.175              |
| FN1         | missense     | 12       | LUNG SQUAMOUS CELL | 0.109              |
| WHSC1       | missense     | 11       | BLADDER UROTHELIA  | 0.10               |
| SYNE1       | missense     | 12       | LUNG SQUAMOUS CELL | 0.34               |
| AKAP9       | missense     | 11       | LUNG ADENO         | 0.10               |
| ATM         | missense     | 11       | BLADDER UROTHELIAL | 0.12               |
| RNF213      | missense     | 12       | BLADDER UROTHELIAL | 0.10               |
| ASXL1       | missense     | 12       | LUNG SQUAMOUS CELL | 0.06               |
| HUWE1       | missense     | 11       | LUNG SQUAMOUS CELL | 0.12               |
| NIN         | splicing     | 12       | BLADDER UROTHELIAL | 0.08               |

Columns report the TCGA driver genes that contain the RRA locus (Driver Gene), the variant type of the RRA locus, the total number of TCGA cancer type in which the gene has been predicted as driver, the cancer type with maximum mutation frequency and the mutation frequency.

Table 7: GENCODE and ENCODE annotations of all the RRAs loci for GRCh38.

| Type             | Total Variants | Class A     | Class B      | Classes A+B  | Class C    |
|------------------|----------------|-------------|--------------|--------------|------------|
| Total SNVs       | 77274 (5736)   | 11827 (951) | 59055 (4325) | 70882 (5276) | 6392 (460) |
| Intergenic       | 36774 (2194)   | 5465 (358)  | 28072 (1656) | 33537 (2014) | 3237 (180) |
| Genecode         | 40500 (3542)   | 6362 (593)  | 30983 (2669) | 37345 (3262) | 3155 (280) |
| Genic*           | 32194 (2973)   | 5065 (488)  | 24668 (2255) | 29733 (2743) | 2461 (230) |
| Intronic         | 30663 (2537)   | 4893 (428)  | 23436 (1916) | 28329 (2344) | 2334 (193) |
| UTR              | 960 (196)      | 136 (32)    | 744 (146)    | 880 (178)    | 80 (18)    |
| Coding           | 571 (240)      | 36 (28)     | 488 (193)    | 524 (221)    | 47 (19)    |
| Functional       | 402 (194)      | 31 (24)     | 335 (156)    | 366 (180)    | 36 (14)    |
| missense         | 331 (176)      | 27 (22)     | 275 (142)    | 302 (164)    | 29 (12)    |
| splicing         | 69 (18)        | 4 (2)       | 59 (14)      | 63 (16)      | 6 (2)      |
| nonsense         | 2 (0)          | 0 (0)       | 1 (0)        | 1 (0)        | 1 (0)      |
| OMIM             | 70 (35)        | 3 (3)       | 63 (30)      | 66 (33)      | 4 (2)      |
| Pseudogenes      | 633 (33)       | 68 (4)      | 487 (24)     | 555 (28)     | 78 (5)     |
| non coding RNA   | 7673 (536)     | 1229 (101)  | 5828 (390)   | 7057 (491)   | 616 (45)   |
| lincRNA          | 4770 (359)     | 769 (70)    | 3592 (254)   | 4361 (324)   | 409 (35)   |
| antisense        | 1513 (92)      | 241 (14)    | 1185 (73)    | 1426 (87)    | 87 (5)     |
| PT               | 1094 (66)      | 178 (15)    | 818 (47)     | 996 (62)     | 98 (4)     |
| NMD              | 169 (12)       | 29 (2)      | 127 (9)      | 156 (11)     | 13 (1)     |
| SO               | 104 (6)        | 11 (0)      | 87 (6)       | 98 (6)       | 6 (0)      |
| Other ncRNA      | 23 (1)         | 1 (0)       | 19 (1)       | 20 (1)       | 3 (0)      |
| Encode Elements  | 18458 (1784)   | 3098 (304)  | 13811 (1340) | 16909 (1644) | 1549 (140) |
| TFP              | 4709 (412)     | 820 (69)    | 3506 (312)   | 4326 (381)   | 383 (31)   |
| DHS              | 6895 (602)     | 1146 (104)  | 5128 (440)   | 6274 (544)   | 621 (58)   |
| Enhancer         | 909 (75)       | 146 (6)     | 690 (64)     | 836 (70)     | 73 (5)     |
| TFP-DHS          | 2231 (279)     | 352 (50)    | 1696 (211)   | 2048 (261)   | 183 (18)   |
| TFP-Enhancer     | 1702 (170)     | 294 (31)    | 1276 (131)   | 1570 (162)   | 132 (8)    |
| DHS-Enhancer     | 467 (38)       | 89 (7)      | 345 (30)     | 434 (37)     | 33 (1)     |
| TFP-DHS-Enhancer | 1545 (208)     | 251 (37)    | 1170 (152)   | 1421 (189)   | 124 (19)   |
| Total Insertions | 17 (2)         | 5 (0)       | 10 (1)       | 15 (1)       | 2 (1)      |
| Intergenic       | 7 (0)          | 1 (0)       | 5 (0)        | 6 (0)        | 1 (0)      |
| Genecode         | 10 (2)         | 4 (0)       | 5 (1)        | 9 (1)        | 1 (1)      |
| Genic*           | 5 (0)          | 2 (0)       | 3 (0)        | 5 (0)        | 0 (0)      |
| Intronic         | 4 (0)          | 1 (0)       | 3 (0)        | 4 (0)        | 0 (0)      |
| UTR              | 1 (0)          | 1 (0)       | 0 (0)        | 1 (0)        | 0 (0)      |
| Coding           | 0 (0)          | 0 (0)       | 0 (0)        | 0 (0)        | 0 (0)      |
| Functional       | 1 (0)          | 0 (0)       | 1 (0)        | 1 (0)        | 0 (0)      |
| splicing         | 1 (0)          | 0 (0)       | 1 (0)        | 1 (0)        | 0 (0)      |
| Frameshift       | 0 (0)          | 0 (0)       | 0 (0)        | 0 (0)        | 0 (0)      |
| OMIM             | 1 (0)          | 0 (0)       | 1 (0)        | 1 (0)        | 0 (0)      |
| Pseudogenes      | 1 (1)          | 0 (0)       | 0 (0)        | 0 (0)        | 1 (1)      |
| non coding RNA   | 4 (1)          | 2 (0)       | 2 (1)        | 4 (1)        | 0 (0)      |
| lincRNA          | 0 (0)          | 0 (0)       | 0 (0)        | 0 (0)        | 0 (0)      |
| antisense        | 0 (0)          | 0 (0)       | 0 (0)        | 0 (0)        | 0 (0)      |
| PT               | 4 (1)          | 2 (0)       | 2 (1)        | 4 (1)        | 0 (0)      |
| NMD              | 0 (0)          | 0 (0)       | 0 (0)        | 0 (0)        | 0 (0)      |
| SO               | 0 (0)          | 0 (0)       | 0 (0)        | 0 (0)        | 0 (0)      |
| Other ncRNA      | 0 (0)          | 0 (0)       | 0 (0)        | 0 (0)        | 0 (0)      |
| Encode Elements  | 4 (0)          | 1 (0)       | 3 (0)        | 4 (0)        | 0 (0)      |
| TFP              | 1 (0)          | 1 (0)       | 0 (0)        | 1 (0)        | 0 (0)      |
| DHS              | 0 (0)          | 0 (0)       | 0 (0)        | 0 (0)        | 0 (0)      |
| Enhancer         | 0 (0)          | 0 (0)       | 0 (0)        | 0 (0)        | 0 (0)      |
| TFP-DHS          | 0 (0)          | 0 (0)       | 0 (0)        | 0 (0)        | 0 (0)      |
| TFP-Enhancer     | 0 (0)          | 0 (0)       | 0 (0)        | 0 (0)        | 0 (0)      |
| DHS-Enhancer     | 0 (0)          | 0 (0)       | 0 (0)        | 0 (0)        | 0 (0)      |
| TFP-DHS-Enhancer | 3 (0)          | 0 (0)       | 3 (0)        | 3 (0)        | 0 (0)      |
| Total Deletions  | 3703 (399)     | 689 (78)    | 2857 (299)   | 3546 (377)   | 157 (22)   |
| Intergenic       | 1523 (136)     | 290 (29)    | 1168 (97)    | 1458 (126)   | 65 (10)    |
| Genecode         | 2180 (263)     | 399 (49)    | 1689 (202)   | 2088 (251)   | 92 (12)    |
| Genic*           | 1769 (236)     | 318 (45)    | 1375 (180)   | 1693 (225)   | 76 (11)    |
| Intronic         | 1725 (218)     | 313 (44)    | 1339 (165)   | 1652 (209)   | 73 (9)     |
| UTR              | 38 (15)        | 4 (0)       | 31 (13)      | 35 (13)      | 3 (2)      |
| Coding           | 6 (3)          | 1 (1)       | 5 (2)        | 6 (3)        | 0 (0)      |
| Functional       | 9 (4)          | 1 (1)       | 7 (2)        | 8 (3)        | 1 (1)      |
| splicing         | 4 (2)          | 0 (0)       | 3 (1)        | 3 (1)        | 1 (1)      |
| Frameshift       | 5 (2)          | 1 (1)       | 4 (1)        | 5 (2)        | 0 (0)      |
| OMIM             | 2 (0)          | 0 (0)       | 2 (0)        | 2 (0)        | 0 (0)      |
| Pseudogenes      | 19 (0)         | 17 (0)      | 2 (0)        | 19 (0)       | 0 (0)      |
| non coding RNA   | 392 (27)       | 64 (4)      | 312 (22)     | 376 (26)     | 16 (1)     |
| lincRNA          | 224 (13)       | 42 (2)      | 172 (10)     | 214 (12)     | 10 (1)     |
| antisense        | 99 (9)         | 12 (1)      | 83 (8)       | 95 (9)       | 4 (0)      |
| PT               | 51 (3)         | 7 (1)       | 42 (2)       | 49 (3)       | 2 (0)      |
| NMD              | 10 (1)         | 3 (0)       | 7 (1)        | 10 (1)       | 0 (0)      |
| SO               | 5 (1)          | 0 (0)       | 5 (1)        | 5 (1)        | 0 (0)      |
| Other ncRNA      | 3 (0)          | 0 (0)       | 3 (0)        | 3 (0)        | 0 (0)      |
| Encode Elements  | 823 (127)      | 154 (19)    | 633 (102)    | 787 (121)    | 36 (6)     |
| TFP              | 256 (44)       | 52 (9)      | 197 (32)     | 249 (41)     | 7 (3)      |
| DHS              | 236 (33)       | 43 (4)      | 183 (28)     | 226 (32)     | 10 (1)     |
| Enhancer         | 53 (5)         | 11 (0)      | 37 (4)       | 48 (4)       | 5 (1)      |
| TFP-DHS          | 94 (17)        | 16 (4)      | 74 (13)      | 90 (17)      | 4 (0)      |
| TFP-Enhancer     | 107 (17)       | 19 (2)      | 81 (14)      | 100 (16)     | 7 (1)      |
| DHS-Enhancer     | 19 (2)         | 4 (0)       | 14 (2)       | 18 (2)       | 1 (0)      |
| TFP-DHS-Enhancer | 58 (9)         | 9 (0)       | 47 (9)       | 56 (9)       | 2 (0)      |

Columns report the total number of variants (Total Variants), the number of variants that belong to classes A, B, A+B and C for all RRA SNVs and InDels. Rows report the GENCODE and ENCODE features at which each RRA has been annotated. For each variant type, in parenthesis are reported the total number of RRAs with RS score larger than 2.



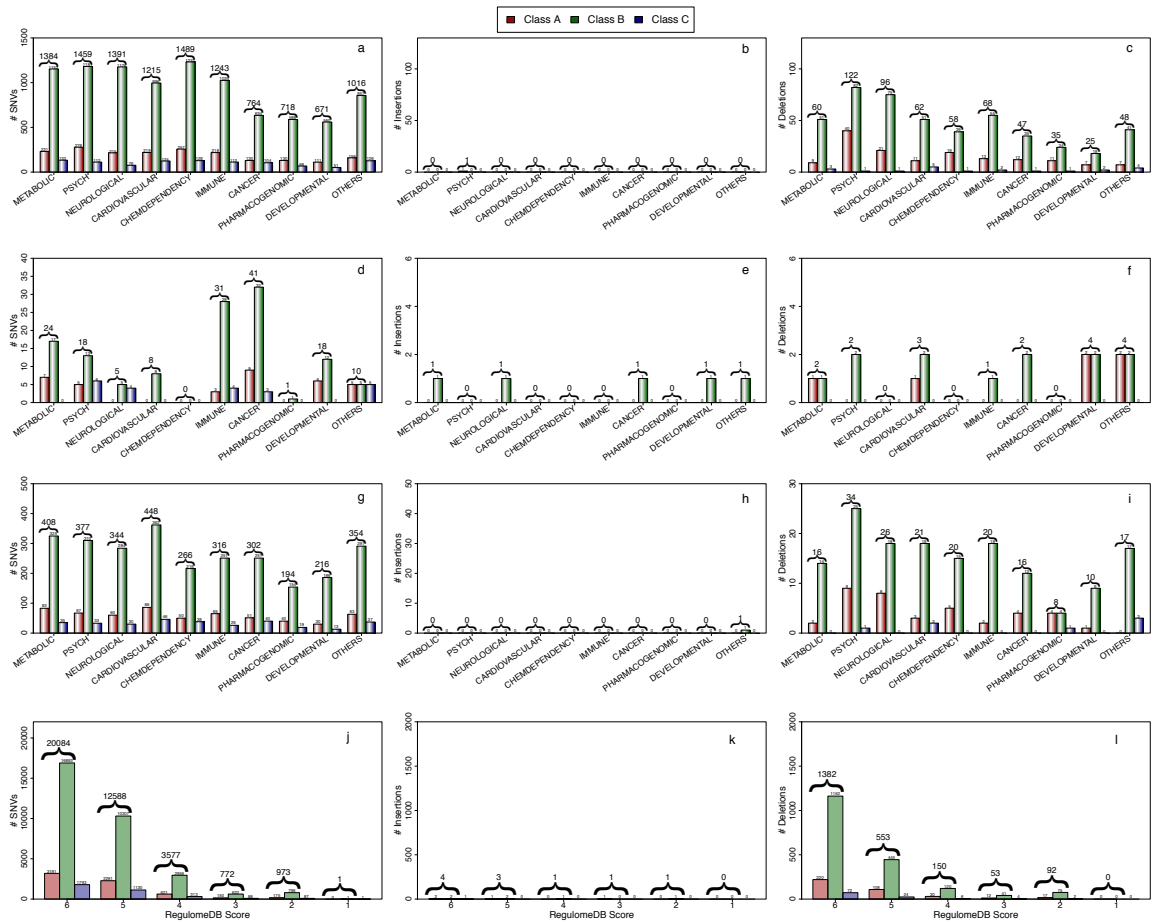

Supplemental Figure 2: GAD and RegulomeDB annotation of GRCh38 RRAs loci. Panels a, b and c report the GAD annotation of SNVs (a), Insertions (b) and Deletions (c) that belong to Protein-coding genes. Panels d, e and f report the GAD annotation of SNVs, Insertions and Deletions that belong to ncRNA biotypes. Each variant can be annotated to multiple GAD phenotype. Panels g, h and i report the GAD annotation of SNVs (g), Insertions (h) and Deletions (i) that belong to regulatory elements annotated at ENCODE. Panels j, k and l report the total number of SNVs (j), Insertions (k) and Deletions (l) as a function of RegulomeDB score. In each panel of the figure, RRA loci have been classified as belonging to class A, B and C (see main text for more details). Numbers on the top of curly brackets represent the sum of classes A and B variants.

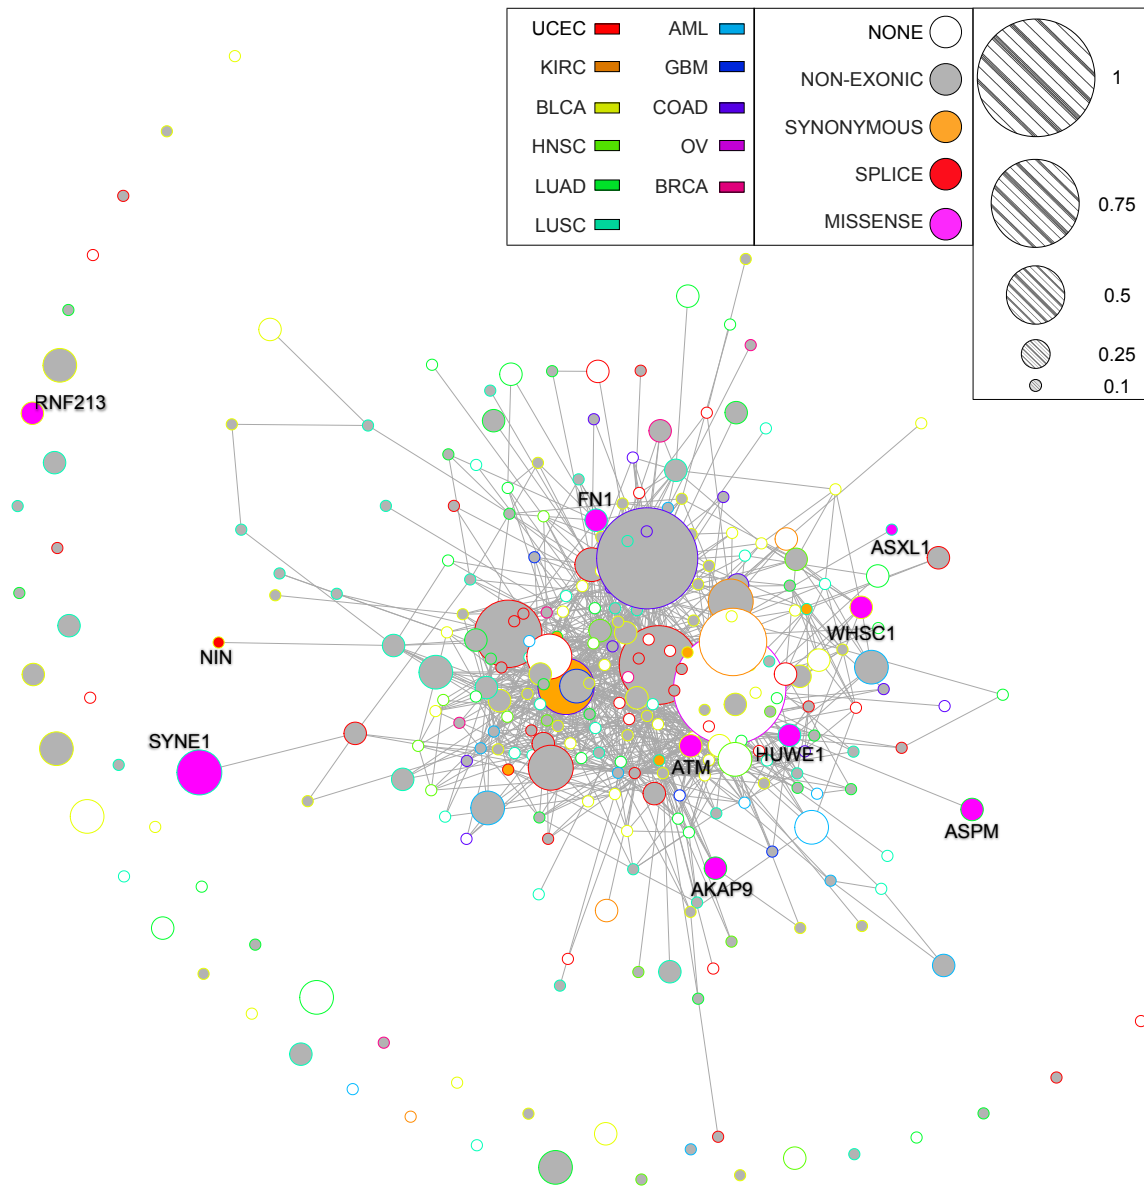

Supplemental Figure 3: Network of TCGA driver genes containing RRA loci in GRCh38. To build the network we selected all the interactions of HumanNet v1 that link the 291TCGA driver genes. Node colors represent the most severe RRA variant contained by each gene: none RRA (white), non-exonic (grey), synonymous (orange), splicing (red) and missense RRA (magenta). Node border colors represent the TCGA cancer type for which the gene has been predicted to be a driver with maximum mutation frequency: AML (Acute Myeloid Leukemia), BLCA (Bladder Urothelial Carcinoma), BRCA (Breast invasive carcinoma), COAD (Colon adenocarcinoma), GBM (Glioblastoma multiforme), HNSC (Head and Neck squamous cell carcinoma), KIRC (Kidney renal clear cell carcinoma), LUAD (Lung adenocarcinoma), LUSC (Lung squamous cell carcinoma), OV (Ovarian serous cystadenocarcinoma), UCEC (Uterine Corpus Endometrial Carcinoma), UVM (Uveal Melanoma). Node radius is a measure of the maximum mutation frequency of the driver gene in the TCGA cancer dataset coded by the border color.
